# Supplementary material for: Veteran-derived cerebral organoids display multifaceted pathological defects in studies on Gulf War Illness
Source: PubMed Central journal article supplement (PMC9816432; doi:10.3389/fncel.2022.979652), 2022-12-23
Supplement: Data_Sheet_1.pdf [file Data_Sheet_1.pdf]

## Supplemental Tables

**Tables 1-4.** Organoids were generated from control and case GWI hiPSC lines. Between 5-10 organoids were fixed with paraformaldehyde and sectioned onto slides at 20 microns. The control line samples were taken from 3 different organoid ‘batches’ and the case line samples were taken from 5 different organoid ‘batches’. 20x images were taken across all of the sections, excluding major rips or necrotic areas.

**Table 1.** GW toxicant regimen produces tau pathology. Tau13 and ps422 AFU levels were obtained for each sample and subsequently normalized to the vehicle per line. Included in the table is this normalized AFU, the percent change, the standard deviation, standard error, and *p* value. Both stains were statistically analyzed with Kruskal-Wallis test.

| <b>Table 1</b>     | Control Vehicle | Control C+D | Case Vehicle | Case C+D |
|--------------------|-----------------|-------------|--------------|----------|
| Organoids Analyzed | ~20             | ~20         | ~30          | ~30      |
| Avg Tau13 AFU      | 1               | 0.7571      | 0.9114       | 1.685    |
| Percent change     |                 | -24.29%     |              | 77.36%   |
| SD (Tau13)         | 0.4072          | 0.1714      | 0.3679       | 0.7505   |
| SE (Tau13)         | 0.09876         | 0.0225      | 0.06831      | 0.1287   |
| p Value (Tau13)    |                 | 0.0657      |              | <0.0001  |
| Avg ps422 AFU      | 1               | 1.062       | 1            | 1.325    |
| Percent change     |                 | 6.20%       |              | 32.50%   |
| SD (ps422)         | 0.5037          | 0.4834      | 0.4971       | 0.6587   |
| SE (ps422)         | 0.1222          | 0.06348     | 0.09076      | 0.1164   |
| p Value (ps422)    |                 | >0.9999     |              | 0.0493   |

**Table 2.** GW toxicant regimen leads to a reduction in microtubule acetylation.  $\beta$ III and acetylated tubulin AFU levels were obtained for each image and then normalized to the vehicle per line. These datapoints were then analyzed for the ratio of  $\beta$ III and acetylated tubulin. Included in the table is this normalized AFU, the percent change, the standard deviation, standard error, and *p* value. Both stains were statistically analyzed with Kruskal-Wallis test. The ratio of  $\beta$ III and acetylated tubulin was analyzed with a one-way ANOVA.

| <b>Table 2</b>                   | Control Vehicle | Control C+D | Case Vehicle | Case C+D |
|----------------------------------|-----------------|-------------|--------------|----------|
| Organoids Analyzed               | ~20             | ~20         | ~30          | ~30      |
| Avg $\beta$ III AFU              | 1               | 1.078       | 1            | 0.9803   |
| Percent change                   |                 | 7.80%       |              | -1.97%   |
| SD ( $\beta$ III)                | 0.3818          | 0.471       | 0.4992       | 0.3999   |
| SE ( $\beta$ III)                | 0.06749         | 0.08326     | 0.0927       | 0.07997  |
| p Value ( $\beta$ III)           |                 | >0.9999     |              | >0.9999  |
| Avg acetylated AFU               | 1               | 0.8822      | 1            | 0.6522   |
| Percent change                   |                 | -11.78%     |              | -34.78%  |
| SD (acetylated)                  | 0.7074          | 0.6081      | 0.6777       | 0.422    |
| SE (acetylated)                  | 0.125           | 0.1075      | 0.1281       | 0.08439  |
| p Value (acetylated)             |                 | >0.9999     |              | 0.1412   |
| Avg $\beta$ III/Acetylated ratio | 1               | 0.8931      | 1            | 0.6805   |
| Percent change                   |                 | -10.69%     |              | -31.95%  |
| SD (ratio)                       | 0.4298          | 0.3032      | 0.4126       | 0.291    |
| SE (ratio)                       | 0.07598         | 1           | 0.07798      | 0.05821  |
| p Value (ratio)                  |                 | 0.4255      |              | 0.0039   |

**Table 3.** GWI toxicant regimen leads to upregulation of the reactive astrocyte marker GFAP. GFAP and S100 $\beta$  AFU was generated for each image and then normalized to the vehicle per line. Included in the table is this normalized AFU, the percent change, the standard deviation, standard error, and *p* value. Both stains were statistically analyzed with Kruskal-Wallis test.

| <b>Table 3</b>     | Control Vehicle | Control C+D | Case Vehicle | Case C+D |
|--------------------|-----------------|-------------|--------------|----------|
| Organoids Analyzed | ~20             | ~20         | ~30          | ~30      |
| Avg GFAP AFU       | 0.9697          | 1.319       | 1            | 1.405    |
| Percent change     |                 | 34.93%      |              | 40.50%   |
| SD (GFAP)          | 0.4162          | 0.5796      | 0.5203       | 0.837    |
| SE (GFAP)          | 0.05561         | 0.06831     | 0.0561       | 0.09601  |
| p Value (GFAP)     |                 | 0.0012      |              | 0.0014   |
| Avg S100B AFU      | 1               | 1.403       | 1            | 0.9736   |
| Percent change     |                 | 40.30%      |              | -2.64%   |
| SD (S100B)         | 0.5497          | 1.056       | 0.611        | 0.6149   |
| SE (S100B)         | 0.08585         | 0.165       | 0.1097       | 0.09846  |
| p Value (S100B)    |                 | 0.4552      |              | >0.9999  |

**Table 4.** GWI toxicant regimen alters neurogenesis. Tile scans of the whole section were taken at 20x magnification and only sections that had no (or minimal) rips and little to no central necrosis were used for the analysis. The total Sox2 and NeuN counts were performed with the ImageJ automatic cell counter across 13-24 total sections from at least 3-5 different organoids. The percent of loop that is proliferative was determined by zooming in on neuroepithelial loops in the tile scans and measuring the area of the Sox2 proliferative zone and subtracting the lumen area. Multiple loops per section were used, hence the higher amount of datapoints. The spread of Sox2 cells associated with a neuroepithelial loop or non-associated with a neuroepithelial loops was determined by adding the total number of Sox2 cells in all the loops of a section and subtracting that from the total number of Sox2 cells. Finally, the number of loops per section area was found by dividing the total number of loops in a section by the total section area. The last three experiments had a lower number of datapoints because each section had to include at least one neuroepithelial loop. All of these datapoints were normalized to vehicle per line. Included in the table is this normalized AFU, the percent change, the standard deviation, standard error, and *p* value. All but the NeuN counts were statistically analyzed with Kruskal-Wallis test. The NeuN count was analyzed with a one-way ANOVA.

| <b>Table 4</b>                    | Control Vehicle | Control C+D | Case Vehicle | Case C+D |
|-----------------------------------|-----------------|-------------|--------------|----------|
| Organoids Analyzed                | <10             | <10         | <10          | <10      |
| Total Sox2 Count per Section Area | 1               | 1.152       | 1.077        | 0.5393   |
| Percent change                    |                 | 15.20%      |              | -53.77%  |
| SD (Sox2 Count)                   | 0.4809          | 0.6545      | 0.7525       | 0.2311   |
| SE (Sox2 Count)                   | 0.1133          | 0.1336      | 0.1536       | 0.06411  |
| p Value (Sox2 Count)              |                 | >0.9999     |              | 0.0208   |
| Total NeuN Count per Section Area | 1               | 0.7184      | 1            | 4.1      |
| Percent change                    |                 | -28.16%     |              | 310.00%  |
| SD (NeuN Count)                   | 0.7612          | 0.5174      | 0.6215       | 2.395    |
| SE (NeuN Count)                   | 0.2111          | 0.1435      | 0.1874       | 0.6913   |
| p Value (NeuN Count)              |                 | 0.8287      |              | <0.0001  |
| Avg Proliferative Area            | 1.003           | 0.9852      | 1.002        | 0.9953   |
